# Supplementary material
Source: MDPI journal article supplement (https://www.mdpi.com/1099-4300/19/10/538)
Supplement: s1 [file s1]

**Supplementary Material**

**Investigating the thermodynamic performances in TO based metamaterial tunable cells with entropy generation approach**

Guoqiang Xu1, Haochun Zhang1, *, Xiu Zhang1, and Yan Jin2

*1 School of Energy Science and Engineering, Harbin institute of Technology, Harbin 150001, China*

*2 Institute of Thermo-Fluid Dynamics, Hamburg University of Technology, Hamburg D-21073, Germany*

**1. Mesh independency analysis for the rotation schemes**

In order to complete the mesh independency analysis, five measured points were selected i.e. A (0.01, 0.015), B (0.015, 0.015), C (0.02, 0.015), D (0.015, 0.02) and E (0.015, 0.01). In addition, five kinds of meshes with different grid numbers were selected for the rotation schemes shown in Fig. 2. The details of the grid information are shown in Table S1.

**Table S1.** Different meshes for each rotation schemes

| Rotation Schemes (Fig.2) | Grid number | | | | | | | | |
| --- | --- | --- | --- | --- | --- | --- | --- | --- | --- |
| 1 | 2 | | 3 | | 4 | | 5 | |
| 30° | 10658 | | 21268 | | 32569 | | 41387 | | 50613 |
| 45° | 11535 | | 21981 | | 33522 | | 42005 | | 51034 |
| 60° | 10893 | | 20785 | | 31257 | | 41891 | | 50793 |

Owing to the relations of local entropy generation rate and temperature distributions, the accuracy and mesh independence of the rotation schemes could be verified by the temperature distributions. Hence, the values of the five measured points in each rotation scheme with different meshes are illustrated in Fig. S1.


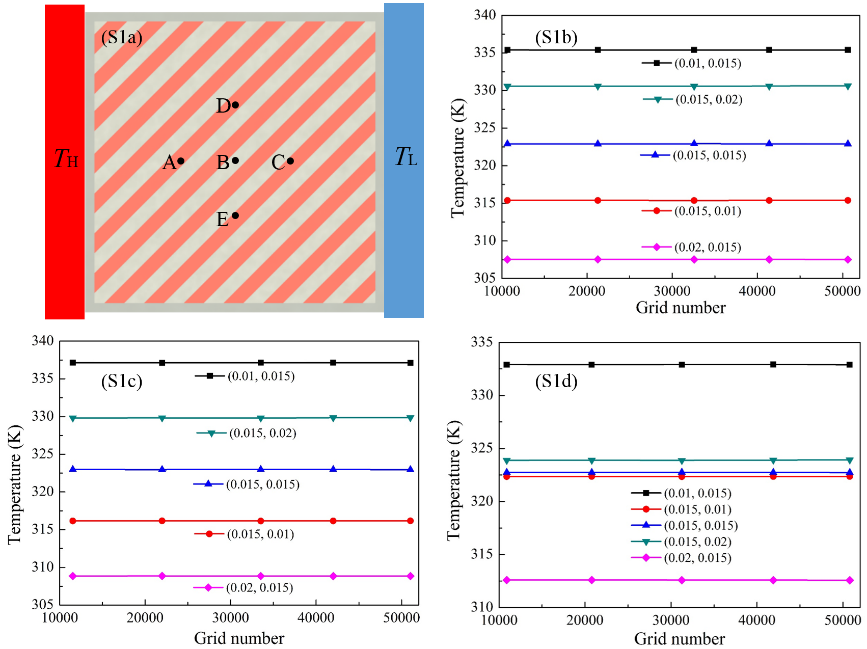


**Fig.S1.** Schematic of tunable cells with five measured points and results of mesh independence analysis (a) Locations of the five measured points; (b) Results for the scheme of rotating 30°; (c) Results for the scheme of rotating 45°; (d) Results for the scheme of rotating 60°.

It can be seen that the temperatures of each measured point had little fluctuations with the increasing grid numbers. That is, the influences of meshes were small enough i.e., the results observed in the manuscript were independent of the meshes. Hence, we adopt the third mesh schemes (about 30000 grids) shown in Table R1 for each tunable cell in our manuscript.

**2. Validations of the obtained results**

In this part, we validated our results from two parts i.e. the mathematical derivations and the simulations. For the first part, the details of the heat flux bending expression have been provided in Refs. [34-36] by applying the constant temperature gradient (*∇*T*x*). The related expression of heat flux bending can be written as [34-36]:

(S1)

By applying the same conditions of constant temperature gradient along the *x* direction of the original domain, the heat flux expressions in the manuscript can be presented as:

(S2a)

(S2b)

Considering the components of heat flux above, the expression of heat flux bending considering the original rotation of *θro* can be observed:

(S3)

The above equation would be accordance with that of Eq. R1 once the original rotation was 0 i.e. *θro*=0. Thus the accuracy of the heat flux expressions in different directions can be ensured. That is, the accuracy of the mathematical derivations can be guaranteed.

Owing to the different materials and geometrical parameters of such structures in [34-36, 38-40], we adopt a contrast between the calculated values found in FLUENT and the theoretical values observed by Eq. (S1) given in [34-36] of the heat flux bending shown in Fig. 2, in order to verify the simulation part. Since the local entropy generation rates were depended on the heat flux components in different directions as shown in Eq. (10), the accuracy would also be ensured by the heat flux bending. The details of the theoretical values and calculated values are shown in Table S2:

**Table S2.** Comparison tests of the heat flux bending

| Rotation Schemes | 30° | 45° | 60° |
| --- | --- | --- | --- |
| Theoretical values [34-36] | 59.85° | 44.91° | 29.95° |
| Calculated values (Fig. 2) | 59.67° | 44.85° | 29.76° |
| Error | 0.301% | 0.134% | 0.367% |

It can be seen from Table S1, the calculated values of each scheme corresponded to the theoretical values, and the errors between the calculated and theoretical values were small enough. Hence, the accuracies of the obtained results in our manuscript can be ensured.

**3. Extensive derivation of 3D thermal metamaterials**

Furthermore, the findings could be also extended into 3D domain, once considering the transformations in the *z* direction [34-37]. The anisotropic thermal conductivity tensor [34-36] for the composites structure can be written as:

(S4)

Considering the following transformation progress:

(S5)

where, *z*c denotes the change in the z direction between the original and transformational domains.

The corresponding Jacobian matrix can be written as:

(S6)

Taking Eq. (S5) into (S6), the Jacobian matrix for the transformation process is obtained:

(S7)

Based on the above derivations, the conductivities tensors can be obtained:

(S8)

In Eq. (R8), the components of κ*x’x’*, κ*x’y’*, κ*y’x’* and κ*y’y’* are same with those in Eq. (6a) and (6b) of the manuscript. Hence, the expression of heat flux in the *z* direction can be written as:

(S9)

Considering Eqs. (9a) and (9b) observed in the manuscript together, the 3D expressions of heat flux in such tunable cells can observed. Hence, the expression of 3D local entropy generation rate in such system can be presented as:

(S10)

Since the temperature gradients adopt in the manuscript were perpendicular to the *z* direction (∇*Tz* = 0) and the rotations were around the *z*-axis in the manuscript (*z*c = 0), the heat flux and local entropy generation rate can be considered in 2D domains.
